# Supplementary material for: Identification of SH2 Domain-Containing Protein 3C as a Novel, Putative Interactor of Dipeptidyl Peptidase 3
Source: MDPI journal article supplement (doi:10.3390/ijms241814178), 2023-09-16
Supplement: s1 [file s1]

## Supplementary material

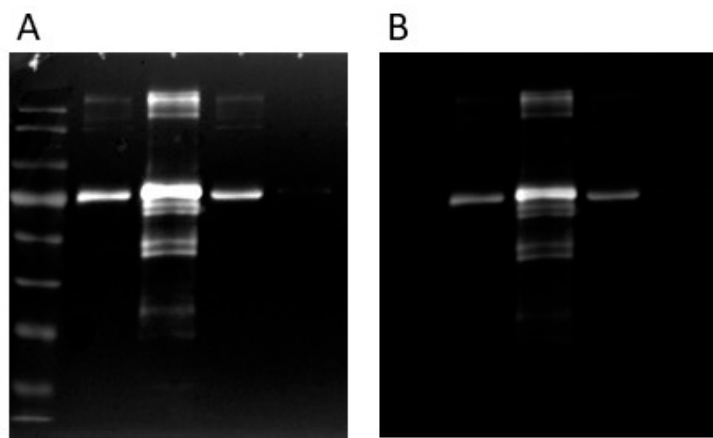

**Figure S1.** Western blot analysis of the co-immunoprecipitation of HA-DPP3 and KEAP1 (A: merged chemiluminescence and visible; B: chemiluminescence)

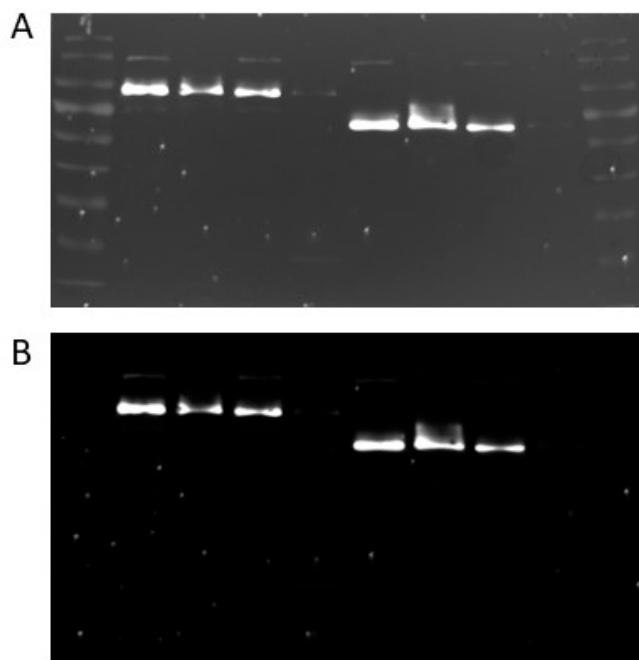

**Figure S2.** Western blot analysis of the co-immunoprecipitation of HA-DPP3 and SH2D3C-isoform 2 and 3, respectively (A: merged chemiluminescence and visible; B: chemiluminescence)

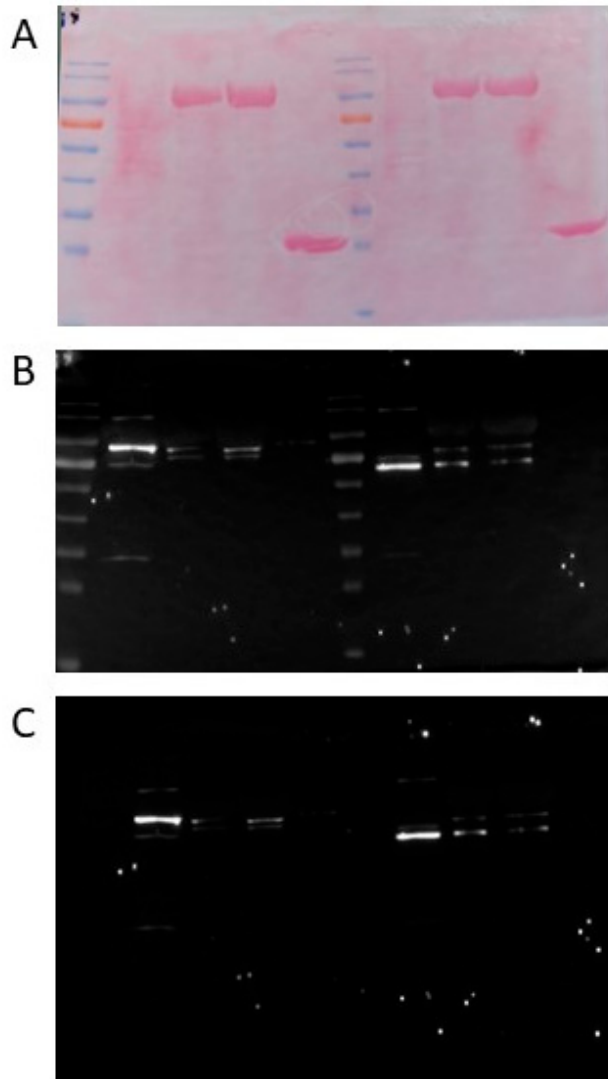

**Figure S3.** Western blot analysis of the GST-DPP3, GST-DPP3-E451A and GST pulldown of SH2D3C-isoform 2 and 3 (A: Ponceau staining; B: merged chemiluminescence and visible; C: chemiluminescence)

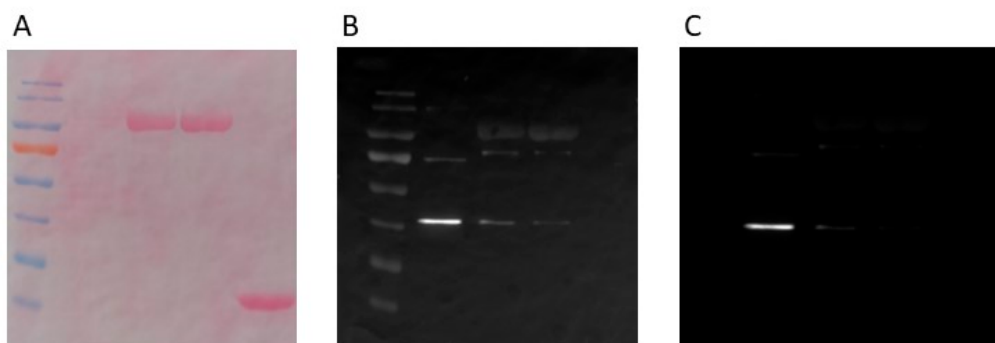

**Figure S4.** Western blot analysis of the GST-DPP3, GST-DPP3-E451A and GST pulldown of SH2D3C-fragment539 (A: Ponceau staining; B: merged chemiluminescence and visible; C: chemiluminescence)

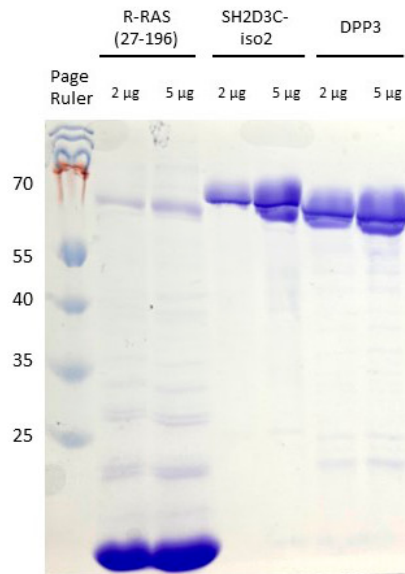

**Figure S5. (A)** SDS-PAGE (14 %) analysis of purified proteins (RRAS\_27-196, DPP3 and SH2D3C-isoform 2) used in GTPase-Glo assay

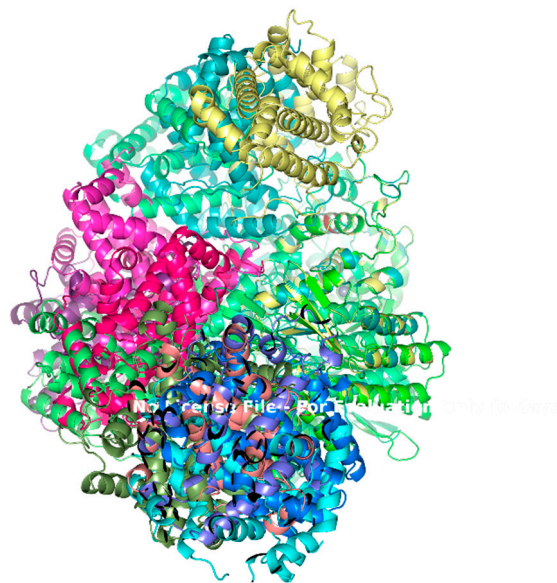

**Figure S6.** The overlap of the best rated protein-protein docking results

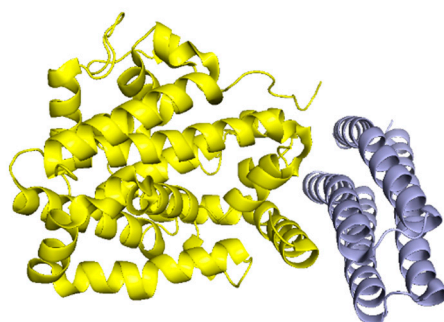

**Figure S7.** The SH2D3C (NSP3) - p130cas complex crystallographically determined (PDB\_id 3t6g). SH2D3C is shown as a yellow and p130cas as a light blue ribbon [1]

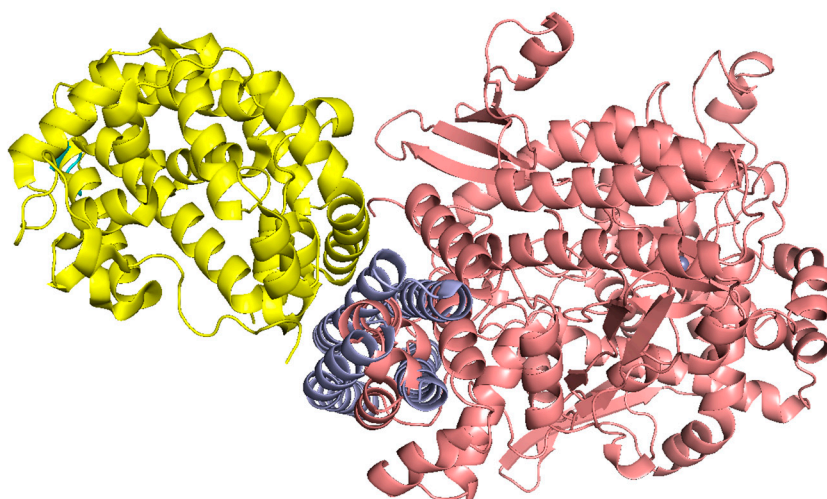

**Figure S8.** Superposition of SH2D3C (NSP3) in the structure of the crystallographically determined SH2D3C (NSP3) - p130cas complex with SH2D3C in the DPP3 - SH2D3C complexes obtained by docking (model 1, M0). The proteins are shown as ribbons: SH2D3C as yellow, p130cas light blue and DPP3 salmon colored. The zinc ion in DPP3 is shown as a gray sphere.

**Table S1.** MMGBSA energies calculated for 500 conformers sampled at 10 ns long intervals throughout MD simulations.

| Time interval<br>(ns) | Model 1<br>(1) | Model 2<br>(2) | Model 3<br>(3) | Model 4<br>(4) | Model 5<br>(5) |
|-----------------------|----------------|----------------|----------------|----------------|----------------|
| 0-10                  | -2.0498        | 23.2582        | 9.5154         | -22.254        | -27.3818       |
| 10-20                 | -5.0435        | 14.45          | 9.6281         | -17.8317       | -31.7587       |
| 20-30                 | 0.6335         | 12.2781        | 1.3759         | -21.3882       | -38.9774       |
| 30-40                 | -11.097        | 12.2034        | 0.5333         | -14.3276       | -40.1269       |
| 40-50                 | -11.2153       | 15.7201        | -12.3807       | -11.818        | -40.813        |
| 50-60                 | -5.6636        | 17.602         | -16.8353       | -11.2413       | -32.5318       |
| 60-70                 | -1.6439        | 15.3425        | -19.3385       | -2.2865        | -35.2631       |

|         |          |         |          |          |          |
|---------|----------|---------|----------|----------|----------|
| 70-80   | -1.386   | 29.2586 | -14.2056 | -11.228  | -26.7547 |
| 80-90   | -2.0153  | 14.45   | -14.6175 | -20.9924 | -40.7935 |
| 90-100  | -3.2732  | 12.2781 | -17.0513 | -21.0878 | -38.9552 |
| 100-110 | -9.2582  | 26.9854 | -27.0466 | -18.1174 | -32.3653 |
| 110-120 | -8.1107  | 17.046  | -22.1286 | -21.4595 | -43.1726 |
| 120-130 | -6.7439  | 29.6434 | -29.6322 | -16.8136 | -40.5071 |
| 130-140 | -4.2571  | 26.0841 | -36.649  | -18.1095 | -43.5816 |
| 140-150 | -5.6741  | 22.8608 | -27.9583 | -17.8753 | -45.0682 |
| 150-160 | -5.9943  | 12.2733 | -33.6704 | -20.2326 | -41.1932 |
| 160-170 | -11.7643 | 19.6722 | -33.8538 | -21.2962 | -40.6299 |
| 170-180 | -11.3386 | 21.3452 | -36.8656 | -21.6677 | -43.5313 |
| 180-190 | -13.4375 | 20.8883 | -44.9649 | -26.074  | -35.11   |
| 190-200 | -12.5538 | 14.982  | -42.0554 | -20.4976 | -38.1427 |
| 200-210 | -11.8413 |         | -44.505  | -22.1455 | -40.3147 |
| 210-220 | -3.142   |         | -40.6565 | -20.08   | -20.3388 |
| 220-230 | -2.3555  |         | -34.0882 | -14.513  | -24.6556 |
| 230-240 | -0.91    |         | -41.1824 | -14.9297 | -28.0908 |
| 240-250 | -0.3086  |         | -37.8306 | -13.0386 | -45.8491 |
| 250-260 | -9.6274  |         | -39.9784 | -14.0938 | -49.5577 |
| 260-270 | -15.5859 |         | -35.1981 | -19.9653 | -43.5163 |
| 270-280 | -16.0029 |         | -30.6349 | -18.4103 | -40.7954 |
| 280-290 | -21.1063 |         | -34.4849 | -18.8073 | -35.4224 |
| 290-300 | -20.2185 |         | -24.3995 | -14.0615 | -36.0945 |
| 300-310 | -24.8655 |         | -25.6969 | -13.0386 | -43.7292 |
| 310-320 | -25.4961 |         | -19.389  | -14.0938 | -34.2367 |
| 320-330 | -17.9655 |         | -23.5039 | -19.9653 | -39.3828 |
| 330-340 | -17.04   |         | -34.7389 | -18.4103 | -43.0145 |
| 340-350 | -14.5702 |         | -30.6646 | -15.4013 | -51.3042 |
| 350-360 | -15.9529 |         | -39.9768 | -19.9893 | -52.8275 |
| 360-370 | -20.6169 |         | -29.0111 | -25.3731 | -55.7425 |
| 370-380 | -21.7599 |         | -29.8122 | -29.2021 | -49.7883 |
| 380-390 | -19.0952 |         | -29.2567 | -25.7938 | -54.0721 |
| 390-400 | -15.0029 |         | -32.9277 | -28.4657 | -52.1238 |
| 400-410 |          |         | -33.747  | -30.8233 | -55.7425 |
| 410-420 |          |         | -29.9035 | -29.216  | -49.7883 |
| 420-430 |          |         | -26.3494 | -26.8955 | -54.0721 |
| 430-440 |          |         | -29.78   | -28.599  | -52.1238 |
| 440-450 |          |         | -29.9502 | -25.6187 | -51.6892 |
| 450-460 |          |         | -24.8036 | -31.0549 | -61.0251 |
| 460-470 |          |         | -18.1017 | -17.523  | -57.094  |
| 470-480 |          |         | -19.2055 | -17.1078 | -55.873  |
| 480-490 |          |         | -19.4906 | -14.8691 | -52.9436 |
| 490-500 |          |         | -23.1147 | -11.2513 | -58.2924 |
| 500-510 |          |         | -23.0992 | -8.1348  | -72.6836 |
| 510-520 |          |         | -24.9644 | -5.413   | -70.968  |
| 520-530 |          |         | -25.5451 | -5.082   | -65.7155 |
| 530-540 |          |         | -34.9402 | -2.0726  | -69.4991 |
| 540-550 |          |         | -31.2142 | -9.0125  | -61.5509 |
| 550-560 |          |         | -22.6877 | -5.1784  | -64.7045 |
| 560-570 |          |         | -40.9062 | -5.5555  | -68.9686 |
| 570-580 |          |         | -44.6727 | -1.0839  | -64.1109 |
| 580-590 |          |         | -37.966  | -9.2651  | -61.4557 |
| 590-600 |          |         | -46.2046 | -11.6927 | -83.9936 |
| 600-610 |          |         | -37.3573 | -6.9671  | -74.2161 |

|                |              |             |              |              |              |
|----------------|--------------|-------------|--------------|--------------|--------------|
| 610-620        |              |             | -31.5457     | -5.4675      | -69.4272     |
| 620-630        |              |             | -51.0995     | 4.443        | -59.0799     |
| 630-640        |              |             | -57.4708     | 4.6024       | -60.1609     |
| 640-650        |              |             | -56.2606     | 1.1906       | -60.2755     |
| 650-660        |              |             | -49.2503     | -3.4329      | -54.6282     |
| 660-670        |              |             | -51.9054     | 1.1117       | -57.1206     |
| 670-680        |              |             | -49.6809     | -5.185       | -53.2531     |
| 680-690        |              |             | -50.0366     | -15.1494     | -60.2048     |
| 690-700        |              |             | -48.0331     | -5.6104      | -58.4852     |
|                |              |             |              |              |              |
| <b>Average</b> | <b>-10.6</b> | <b>19.3</b> | <b>-30.5</b> | <b>-15.0</b> | <b>-49.2</b> |
| <b>Av100</b>   | <b>-19.2</b> | <b>21.2</b> | <b>-48.3</b> | <b>-26.0</b> | <b>-60.7</b> |

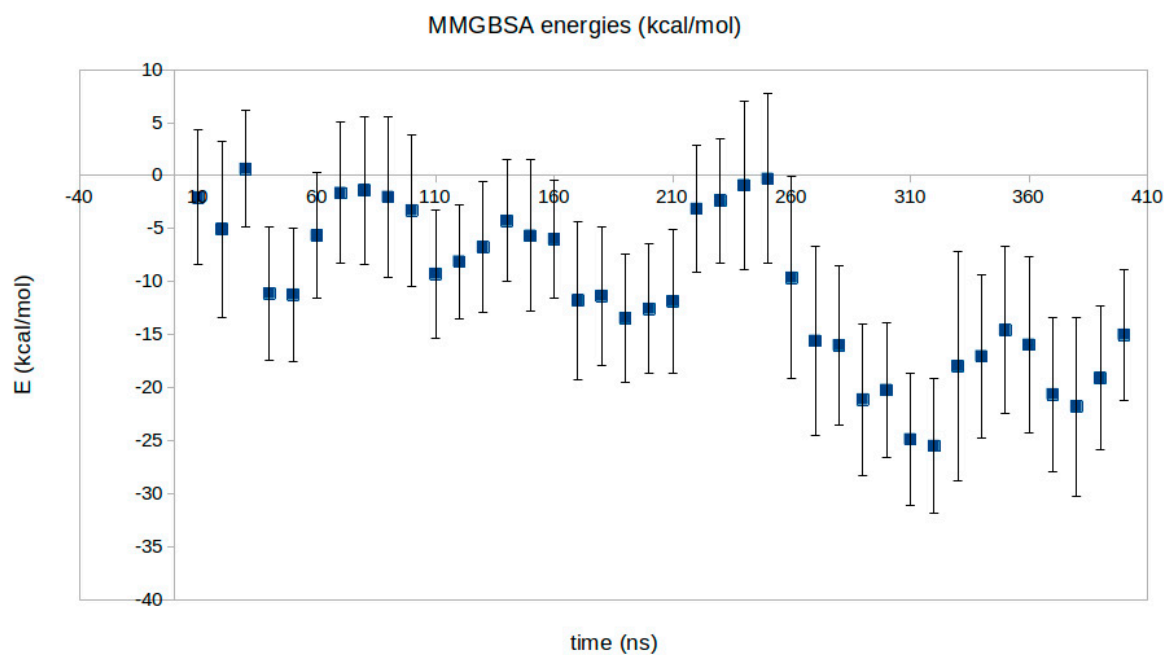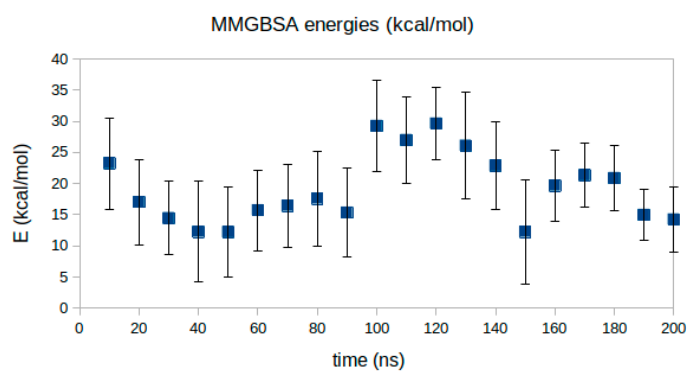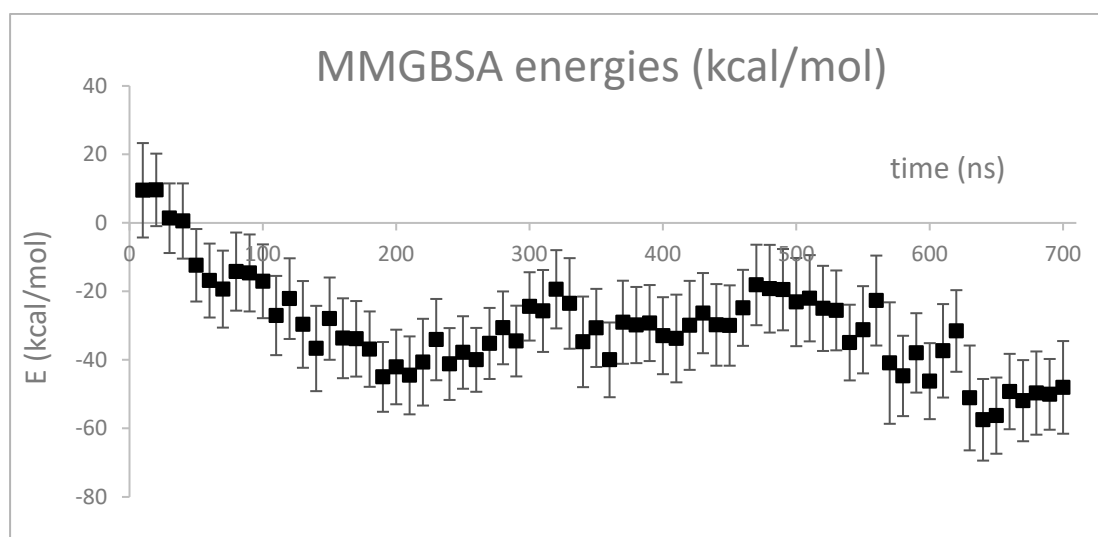

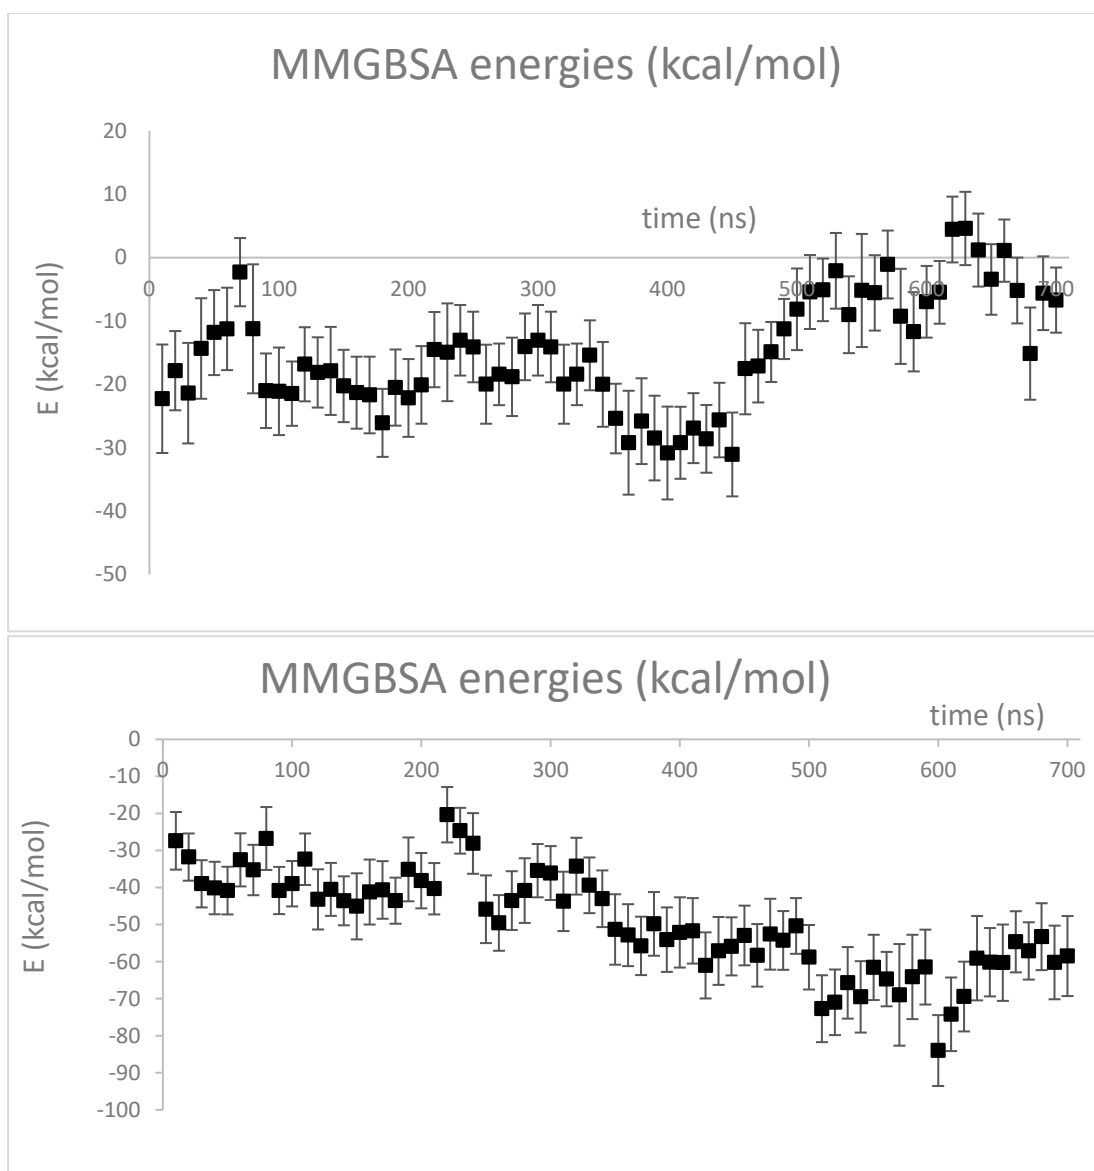

**Figure S9.** MMGBSA energies (and their standard deviation) for models 1 to 5 (from top to bottom). Values were calculated for conformers sampled at 10-ns intervals throughout MD simulations.



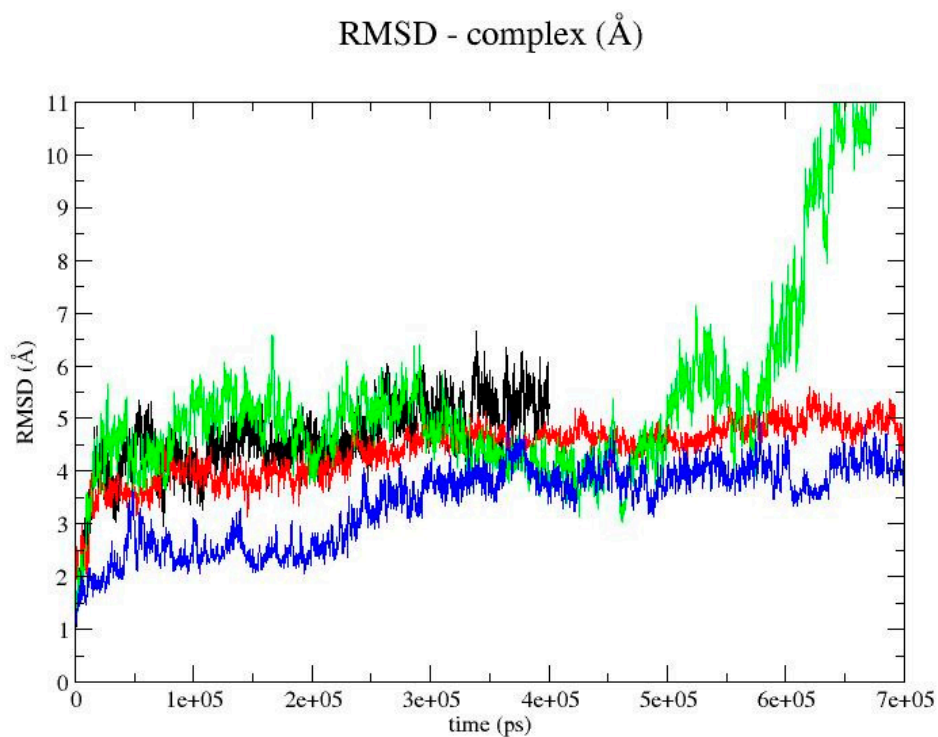

**Figure S10.** RMSD of the models (DPP3 – SH2D3C complex) during MD simulations (model 1 black, model 3 red, model 4 green, model 5 blue line).

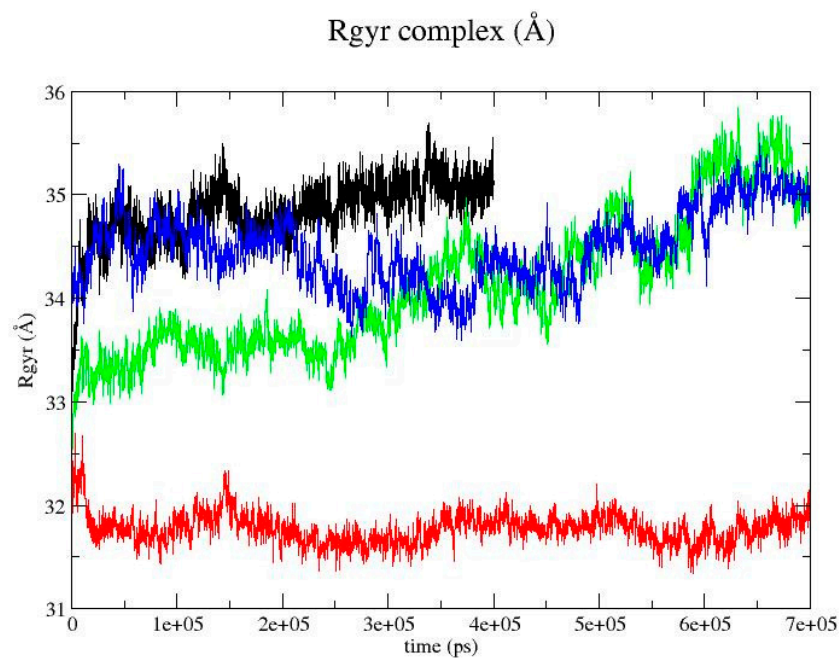

**Figure S11.** Rgyr of the models (DPP3 – SH2D3C complex) during MD simulations (model 1 black, model 3 red, model 4 green, model 5 blue line).

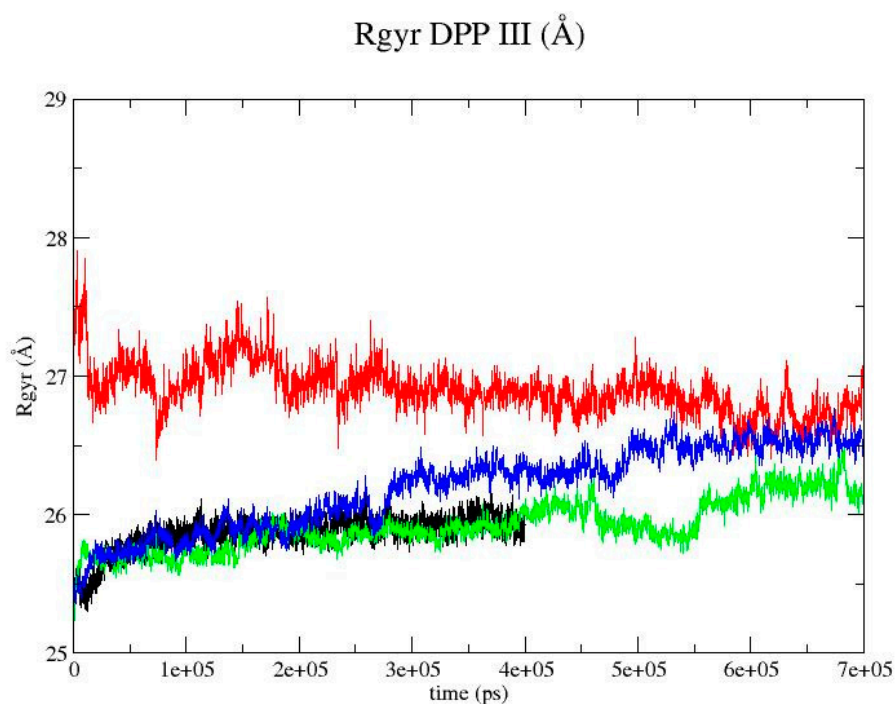

**Figure S12.** Rgyr of DPP3 in different models (DPP3 – SH2D3C complex) during MD simulations (model 1 black, model 3 red, model 4 green, model 5 blue line).

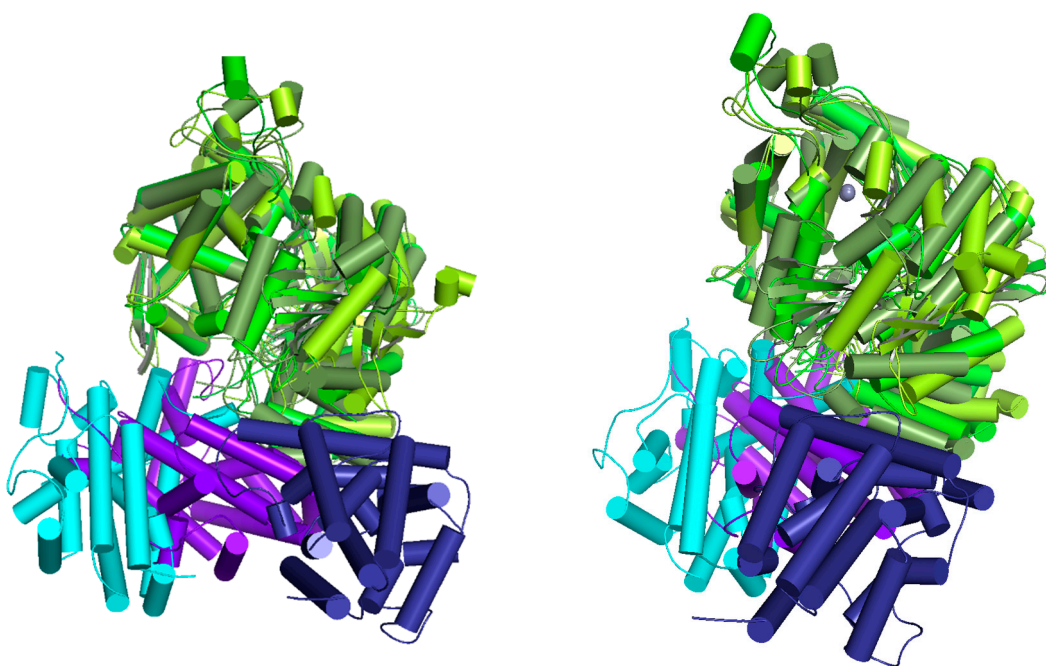

**Figure S13.** Superposition of the structures of the complexes from the range of lowest MMGBSA energies. Two different views are shown. Model 1 DPP3 – forest green, SH2D3C – dark blue; model 3 – DPP3 lemon green, SH2D3C – purple; model 4 – DPP3 light green, SH2D3C – cyan.

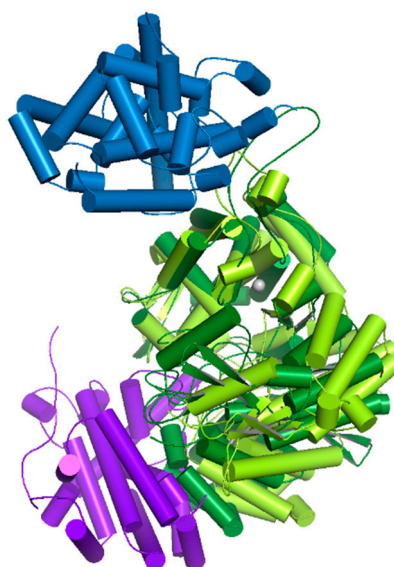

**Figure S14.** Superposition of the structures of the complexes from the range of the lowest MMGBSA energies obtained by simulation of models 3 and 5. Model 5: DPP3 – forest green, SH2D3C – dark blue; model 3: DPP3 – lemon green, SH2D3C – purple.

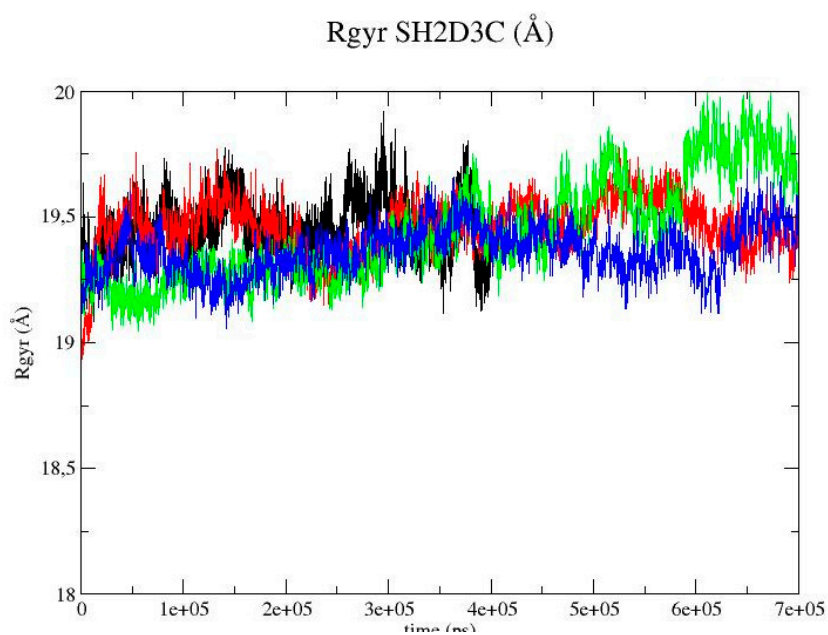

**Figure S15.** Rgyr of SH2D3C in different models (DPP3 – SH2D3C complex) during MD simulations (model 1 black, model 3 red, model 4 green, model 5 blue line).

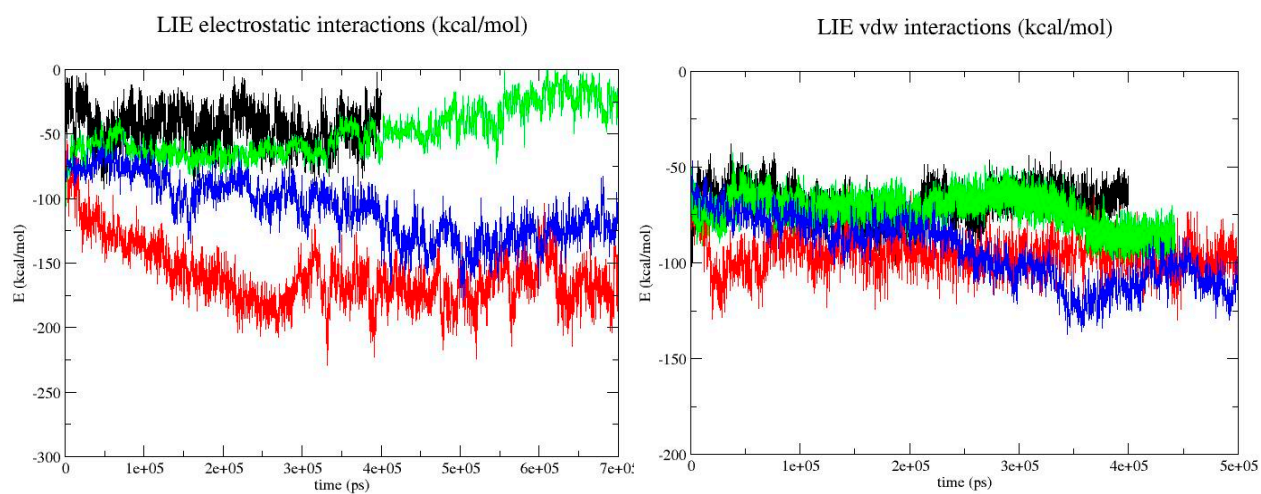

**Figure S16.** Electrostatic (left) and vdw (right) energies calculated by LIE method, for different models (DPP3 – SH2D3C complex) during MD simulations (model 1 black, model 3 red, model 4 green, model 5 blue line).

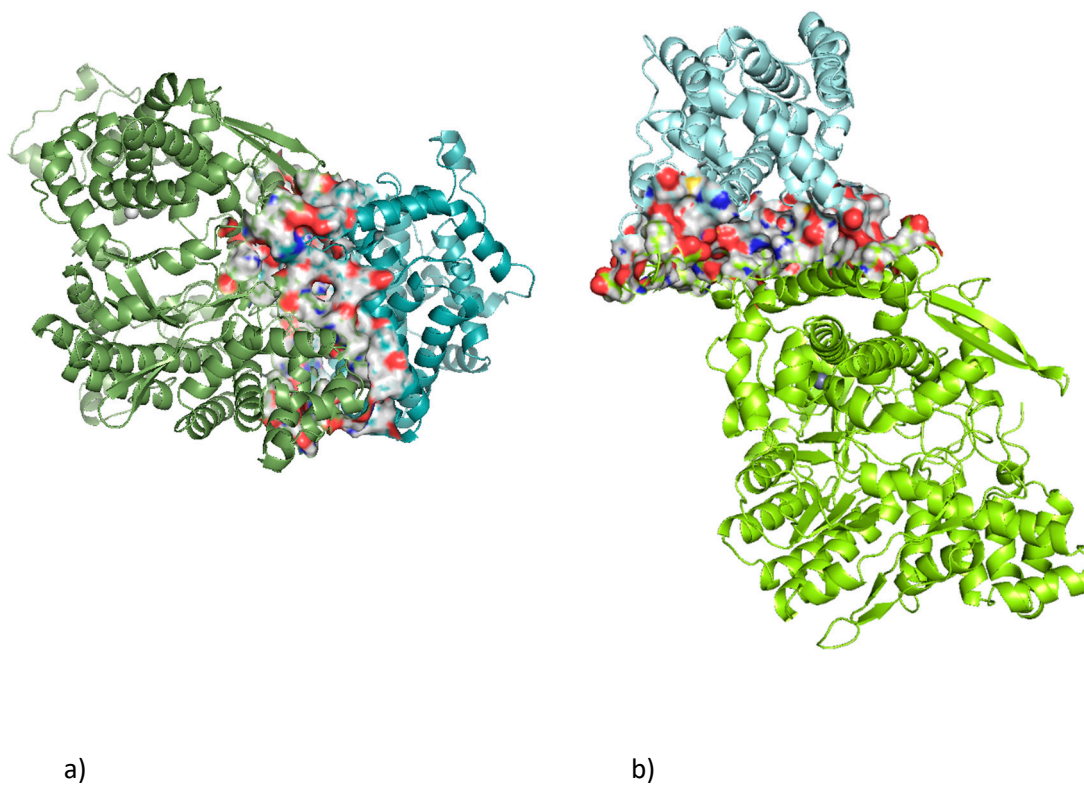

**Figure S17.** Structure of the models for which MMGBSA energies were low with shown interface between DPP3 and SH2D3C: a) model 3, and b) model 5.



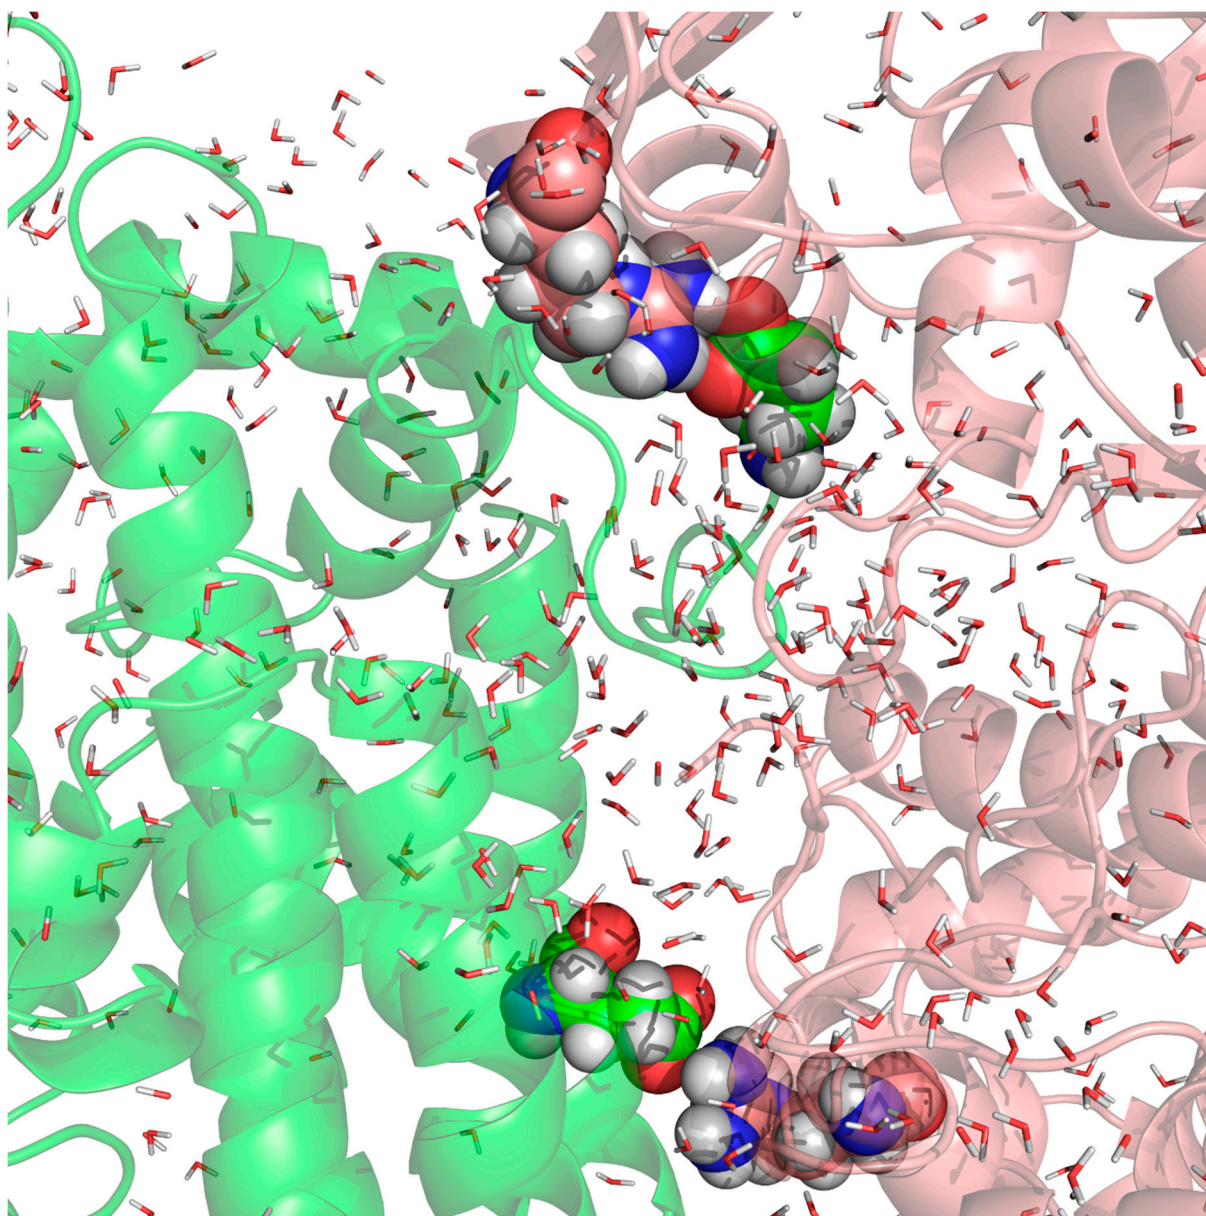

**Figure S18.** Water molecules accommodated between DPP3 (purple) and SH2D3C (green) in model 3. Only the water molecules within 3 Å of the protein surface are shown. The strongest hydrogen bonds between the guanidino group of R598 of DPP III and the carboxyl group of E613 of SH2D3C and between the guanidino group of R125 of DPP III and the carboxyl group of E562 of SH2D3C are shown in spherical representation.

**Table S2.** Solvation component of MMGBSA energies for models 3 and 5 for the period of 200 ns of MD simulations.

| Time (ns) | Model 3  | Model 5  |
|-----------|----------|----------|
| 310       | 466.8015 | 351.1687 |
| 320       | 427.4329 | 369.8487 |
| 330       | 474.0169 | 363.5811 |

|                            |              |              |
|----------------------------|--------------|--------------|
| 340                        | 501.5235     | 457.9127     |
| 350                        | 461.5402     | 432.5074     |
| 360                        | 493.6488     | 404.8261     |
| 370                        | 478.23       | 393.6198     |
| 380                        | 496.7344     | 354.7116     |
| 390                        | 530.615      | 391.8908     |
| 400                        | 515.7376     | 409.0791     |
| 410                        | 469.9923     | 458.9901     |
| 420                        | 480.4632     | 469.3139     |
| 430                        | 499.3576     | 519.8886     |
| 440                        | 540.8209     | 530.308      |
| 450                        | 513.8672     | 485.2719     |
| 460                        | 521.2531     | 493.318      |
| 470                        | 535.9191     | 499.5316     |
| 480                        | 500.6476     | 449.0087     |
| 480                        | 609.6751     | 464.6251     |
| 490                        | 564.4617     | 533.7824     |
| 500                        | 518.3735     | 351.1687     |
| <b>Average (300-500)ns</b> | <b>504.8</b> | <b>441.7</b> |

**Table S3.** Population of intermolecular hydrogen bonds during MD simulations. Only bonds with a population greater than 10% are shown. Data are given for simulation time of 400 ns for model 1 and for 500 ns for models 3, 4, and 5.

| Model 1                       |     | Model 3                       |     | Model 4                       |     | Model 5                       |     |
|-------------------------------|-----|-------------------------------|-----|-------------------------------|-----|-------------------------------|-----|
| Residues<br>(DPP3-<br>SH2D3C) | (%) | Residues<br>(DPP3-<br>SH2D3C) | (%) | Residues<br>(DPP3-<br>SH2D3C) | (%) | Residues<br>(DPP3-<br>SH2D3C) | (%) |
| E139-R461                     | 39  | T4-E607                       | 81  | T4-C588                       | 37  | E465-S669                     | 32  |
| T146-R627                     | 114 | Q5-E607                       | 38  | T4-G610                       | 10  | N478-V387                     | 15  |
| R157-E617                     | 55  | N10-E574                      | 22  | T4-E607                       | 17  | E483-R473                     | 38  |
| E710-R461                     | 51  | D11-T612                      | 52  | Q5-G610                       | 20  | Q484-Q474                     | 78  |
| T720-E624                     | 12  | D11-E613                      | 57  | Q5-S606                       | 25  | Q486-S675                     | 60  |
| W726-E617                     | 18  | D11-H614                      | 23  | Y6-G610                       | 67  | Q486-Q676                     | 35  |
|                               |     | D82-K563                      | 21  | Y6-T612                       | 12  | R620-C598                     | 16  |
|                               |     | E87-K576                      | 82  | L7-T612                       | 20  | R620-D599                     | 50  |
|                               |     | E87-K570                      | 78  | V115-T612                     | 72  | R620-E607                     | 77  |
|                               |     | D111- E604                    | 78  | N117-T612                     | 47  | R623-S600                     | 18  |
|                               |     | T112-E604                     | 143 | S595-R627                     | 26  | R623-D599                     | 19  |
|                               |     | N117-E574                     | 70  | R598-D599                     | 100 | R624-C598                     | 69  |
|                               |     | E121-R551                     | 81  | R598-H622                     | 13  | R624-D599                     | 16  |
|                               |     | E121-K566                     | 21  |                               |     | R624-A601                     | 20  |
|                               |     | R125-E562                     | 207 |                               |     | R624-E607                     | 225 |
|                               |     | R157-V698                     | 14  |                               |     | D633-R678                     | 30  |
|                               |     | R159-D684                     | 193 |                               |     |                               |     |
|                               |     | K165-E681                     | 72  |                               |     |                               |     |
|                               |     | E166-K685                     | 82  |                               |     |                               |     |
|                               |     | E422-V616                     | 26  |                               |     |                               |     |
|                               |     | K423-E613                     | 76  |                               |     |                               |     |
|                               |     | R598-E613                     | 203 |                               |     |                               |     |
|                               |     | D660-S600                     | 41  |                               |     |                               |     |
|                               |     | D660-A601                     | 26  |                               |     |                               |     |
|                               |     | K666-P603                     | 56  |                               |     |                               |     |
|                               |     | K666-E604                     | 12  |                               |     |                               |     |

**Table S4.** Primers used for cloning and mutagenesis

| Primer               | Sequence                              | Purpose                                   |
|----------------------|---------------------------------------|-------------------------------------------|
| DPP3-TO.HA-XhoI-F    | ctaCTCGAGcaATGGCGGACACCCAG            | cloning of DPP3 in pcDNA4.TO.HA           |
| DPP3-TO.HA-Xho-R     | cgtaCTCGAGTTAAGCTTGCCAGATGG           |                                           |
| DPP3-E451A-F         | GGTGGGCCTGCACGCGCTGCTGGGCCATG         | DPP3-E451A mutagenesis                    |
| DPP3-E451A-R         | CATGCCCCAGCAGCGCGTGCAGGCCACC          |                                           |
| FLAG-SH2D3C.FOR      | cgactctagaggatccATGACAGAGGGGACCAAGAAG | cloning of SH2D3C-isoform 1 in pFLAG-CMV2 |
| FLAG-SH2D3C.REV      | atgccaccgggatccCaGCTCGCTGGAGCGG       |                                           |
| FLAG-SH2D3C-iso2.FOR | cgactctagaggatccATGACTGCTGTGGGCCG     | cloning of SH2D3C-isoform 2 in pFLAG-CMV2 |
| FLAG-SH2D3C.REV      | atgccaccgggatccCaGCTCGCTGGAGCGG       |                                           |
| FLAG-SH2D3C-iso3.FOR | cgactctagaggatccATGAAGCGGCGCAGC       | cloning of SH2D3C-isoform 3 in pFLAG-CMV2 |
| FLAG-SH2D3C.REV      | atgccaccgggatccCaGCTCGCTGGAGCGG       |                                           |
| DPP3-XhoI-F1         | atttCTCGAGTTATGGCGGACACCCAGTAC        | cloning of DPP3 in pEGFP-C1               |
| DPP3-PstI-R1         | ttaCTGCAGTCAAGCTTGCCAGATGG            |                                           |
| KEAP1-XhoI-F         | cgaCTCGAGCTATGCAGCCAGATCC             | cloning of KEAP1 in pmCherry-C1           |

|                         |                                         |                                                            |
|-------------------------|-----------------------------------------|------------------------------------------------------------|
| KEAP1-BamHI-R           | cagGGATCCTCAACAGGTACAGTTC               |                                                            |
| SH2D3C-N-mCherry-C1.FOR | CTAGCGCTACCGGTCATGACAGAGGGGACCAAGAAGAC  | cloning of SH2D3C-isoform 1 in pmCherry-C1                 |
| SH2D3C-N-mCherry-C1.REV | GCTCACCATGGTGGCCaGCTCGCTGGAGCGG         |                                                            |
| pcDNA3.1.FOR            | GCGGCCGCTCGAGTCTAG                      | amplification of pcDNA                                     |
| pcDNA3.1.REV            | GGTGGCAAGCTTAAGTTTAAACGC                |                                                            |
| pcDNA3.1-VenusfN.FOR    | CTTAAGCTTGCCACCgataccggtCGGAGTATAGCC    | cloning of VenusfN in pcDNA3.1                             |
| pcDNA3.1-VenusfN.REV    | GACTCGAGCGGCCGCctataggagagagctatgacgtcg |                                                            |
| pcDNA3.1-Venus-fC.FOR   | CTTAAGCTTGCCACCatggataccggtCGGAGTATAGC  | cloning of VenusfC in pcDNA3.1                             |
| pcDNA3.1-Venus-fC.REV   | GACTCGAGCGGCCGCagctatgacgtcgcatgc       |                                                            |
| pcDNA3.1-CfN.FOR        | gataccggtCGGAGTATAGCCAC                 | amplification of pcDNA3.1-CfN vector for In-Fusion cloning |
| pcDNA3.1-CfN.REV        | GGTGGCAAGCTTAAGTTTAAACGC                |                                                            |
| pcDNA3.1-DPP3-CfN.FOR   | CTTAAGCTTGCCACCATGGCGGACACCCAGT         | cloning of DPP3 in pcDNA3.1-CfN                            |
| pcDNA3.1-DPP3-CfN.REV   | ACTCCGaccggtatcAGCTTGCCAGATGGG          |                                                            |
| pcDNA3.1-CfC.FOR        | atggataccggtCGGAGTATAGC                 | amplification of pcDNA3.1-CfN vector for In-Fusion cloning |
| pcDNA3.1-CfC.REV        | GGTGGCAAGCTTAAGTTTAAACGC                |                                                            |
| pcDNA3.1-SH2D3C-CfC.FOR | CTTAAGCTTGCCACCATGACAGAGGGGACCAAG       | cloning of SH2D3C-isoform 1 in pcDNA3.1-CfC                |
| pcDNA3.1-SH2D3C-CfC.REV | CCGaccggtatccatCaGCTCGCTGGAGC           |                                                            |
| pcDNA3.1-NfC.FOR        | TAGAGGGCCCGTTAAACCC                     | amplification of pcDNA3.1-NfC vector for In-Fusion cloning |
| pcDNA3.1-NfC.REV        | GACTCGAGCGGCCGCag                       |                                                            |
| pcDNA3.1-NfC-SH2D3C.FOR | GCGGCCGCTCGAGTCATGACAGAGGGGACCAAGAAGAC  | cloning of SH2D3C-isoform 1 in pcDNA3.1-NfC                |
| pcDNA3.1-NfC-SH2D3C.REV | TAAACGGGCCCTCTACaGCTCGCTGGAGCGG         |                                                            |
| pET15b.FOR              | catatggctgccgcg                         | amplification of pET15b vector for In-Fusion cloning       |
| pET15b.REV              | TGAggatccggctgctaacaag                  |                                                            |
| pET15b-RRas27-196.FOR   | cgcgccagccatgatgagcgagacgcataagttgg     | cloning of RRAS in pET15b                                  |
| pET15b-RRas27-196.REV   | gcagccgatccTCAttgttcttggtacttacgaaccg   |                                                            |

1. Mace, P.D.; Wallez, Y.; Dobaczewska, M.K.; Lee, J.J.; Robinson, H.; Pasquale, E.B.; Riedl, S.J. NSP-Cas protein structures reveal a promiscuous interaction module in cell signaling. *Nat. Struct. Mol. Biol.* **2011**, *18*, 1381–1387, doi:10.1038/nsmb.2152.
